# Supplementary material for: Biallelic loss of function variants in FUZ result in an orofaciodigital syndrome
Source: PubMed Central journal article supplement (PMC11291644; doi:10.1038/s41431-024-01619-6), 2024-05-03
Supplement: 41431_2024_1619_MOESM2_ESM.pdf [file 41431_2024_1619_MOESM2_ESM.pdf]

|                         | <b>p.(Glu201Lys)</b>        |     |
|-------------------------|-----------------------------|-----|
| Homo sapiens            | WW-RLGTFEAVLLPWLVGSLPPQTAR  | 218 |
| Pan troglodytes         | WW-RLGTFEAVLLPWLVGSLPPQTAR  | 218 |
| Pongo abelii            | WW-RLGTFEAVLLPWLVGSLPPQTAR  | 218 |
| Felis catus             | WW-RLGTFEAVLLPWLVGSLPPQAAR  | 218 |
| Rattus norvegicus       | WW-RLGMFEAVLLPWLVGSLPPQAAR  | 218 |
| Xenopus tropicalis      | WW-RLSSQEVMLLCWLVASLAPHSSR  | 210 |
| Drosophila melanogaster | WW-DLDTRELLLFLLNSS-STMQH    | 219 |
| Carassius auratus       | WWSRLSSQEVVVLVSVLVHSLSGASSC | 217 |
|                         | ** : ** * . : : * * : *     |     |

Supplementary figure 1: Multiple sequence alignment of p.(Glu201Lys) in *FUZ* indicates that glutamine residue at 201 position is conserved among different vertebrates. An asterisk (\*) represents fully conserved residue, colon (: ) represents residues with strongly similar properties, and period (.) represents residues with weakly similar properties.

A)

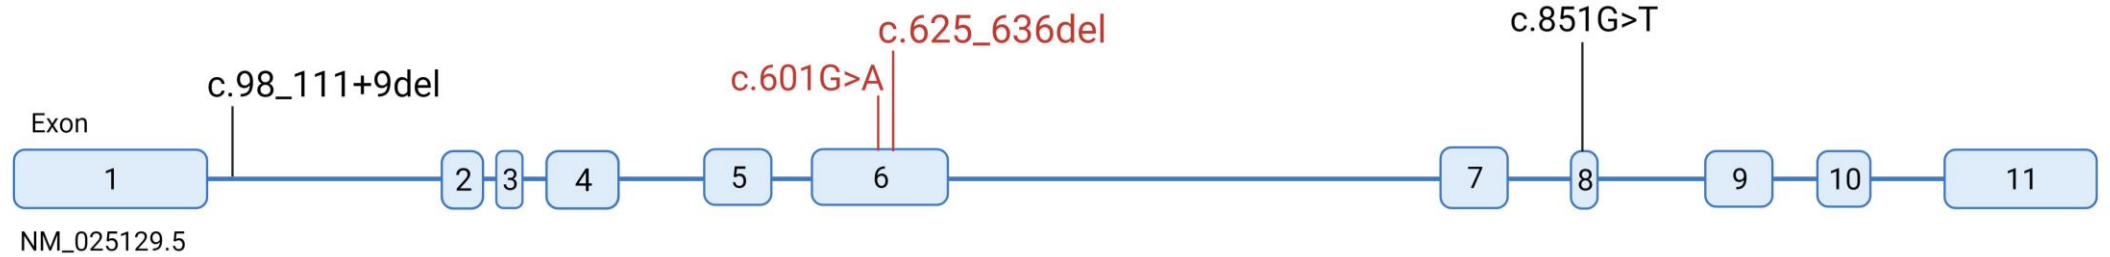

B)

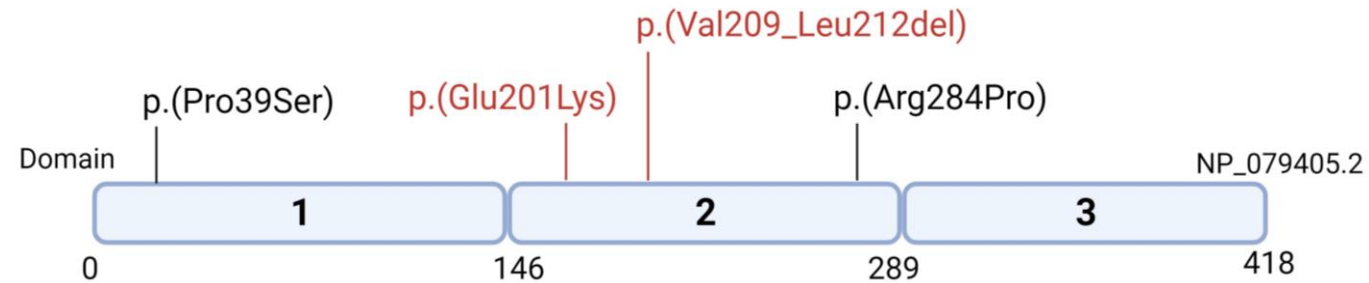

Supplementary figure 2: A) Cartoon illustration of structure of the gene (*FUZ*) and (B) domains of *FUZ* protein with disease-causing variants identified in individuals with *FUZ* related disorders. Novel biallelic variants identified in this study are coded in red.
